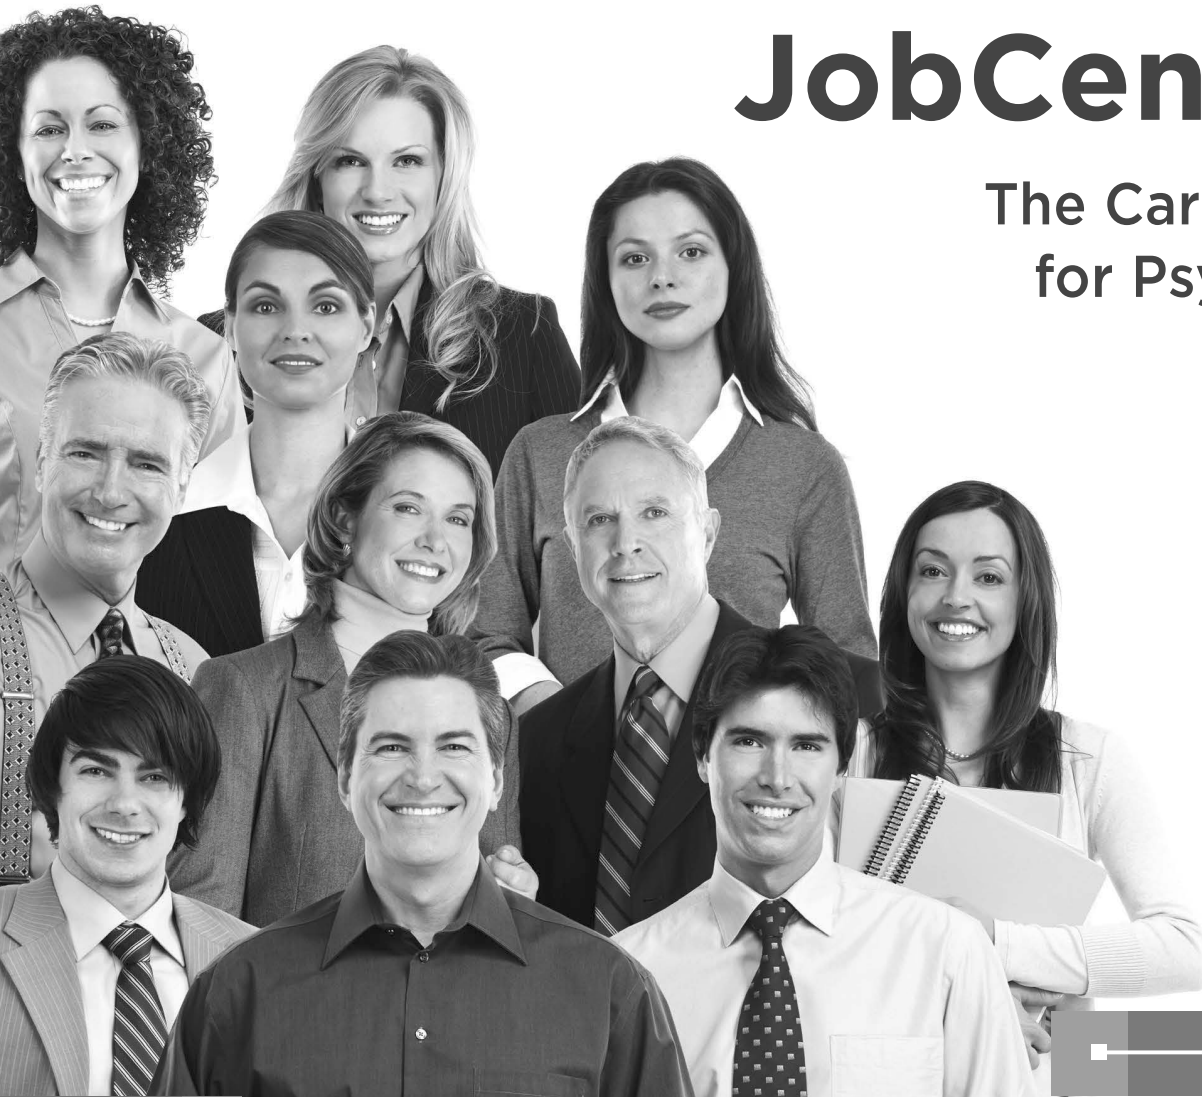

# JobCentral

The Career Hub  
for Psychiatry

## Manage Your Career

- Browse thousands of active job listings!
- Create an account to save jobs, store multiple resumes and cover letters and communicate with employers through our internal messaging system.
- Set up multiple job alerts specifying your skills, interests and location to receive e-mails when employers post jobs that match your criteria.

## Recruit for Open Positions

- Post your job in front of thousands of highly qualified psychiatrists.
- Cross promote your job listing in Psychiatric News.
- Search the anonymous resume database to find your ideal candidate.

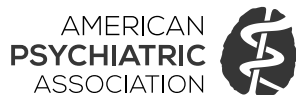

**JOBCENTRAL**  
The Career Hub for

**jobs.psychiatry.org**

# Essential Titles for Mental Health Professionals

## Clinical Manual of Palliative Care Psychiatry

Nathan Fairman, M.D., M.P.H., Jeremy M. Hirst, M.D., and  
Scott A. Irwin, M.D., Ph.D.

Psychiatrists and residents are faced with the task of refreshing their In recent years, palliative care has emerged as the leading model of person-centered care focused on preserving quality of life and alleviating distress for people and families experiencing serious and life-limiting medical illness. Alongside this development has come a growing recognition of the need for expertise in psychiatric diagnosis, psychopharmacology, and psychotherapy within the interdisciplinary team of specialists tasked with identifying and addressing the varied sources of suffering in patients with advanced medical illnesses. The *Clinical Manual of Palliative Care Psychiatry* was written to motivate and guide readers—whether mental health clinicians or palliative care providers—to deepen their understanding of the psychosocial dimensions of suffering for the benefit of seriously ill patients and the support of their families.

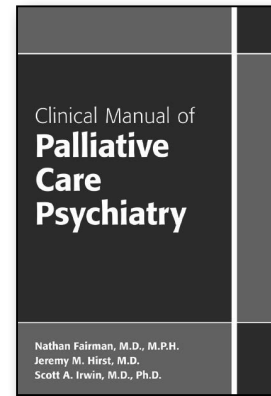

2016 • 304 pages • ISBN 978-1-58562-476-8 • Paperback • \$61.00 • Item #62476

2016 • 304 pages • ISBN 978-1-61537-061-0 • eBook • \$48.95 • Item #37061

## People With Mental Illness in the Criminal Justice System

Answering a Cry for Help

Group for the Advancement of Psychiatry  
Committee on Psychiatry and the Community

Written by a committee of the Group for the Advancement of Psychiatry, *People With Mental Illness in the Criminal Justice System: Answering A Cry for Help* represents the collective wisdom of leaders in community psychiatry and is the third in a series of successful publications that have used Dear Abby letters as source material. The letters, submitted by readers with experience with mental illness and the criminal justice system, constitute a rich, real-world repository for the case stories presented in this fascinating volume. Using the experiences shared in the letters, the authors employ the Sequential Intercept Model to present a series of chapters offering detailed recommendations for psychiatrists, group practices, and criminal justice entities on partnering with individuals who are at risk and their families, with the goal of improving outcomes.

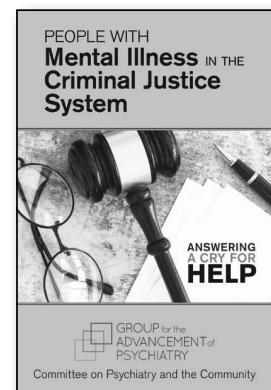

This book can potentially reduce the overrepresentation of people with mental illnesses in justice settings, provide alternatives to incarceration, and divert individuals who do not pose a public safety risk from jail.

2016 • 175 pages • ISBN 978-0-87318-219-5 • Paperback • \$31.50 • Item #7219

2016 • 175 pages • ISBN 978-0-87318-220-1 • eBook • \$25.00 • Item #7220

AMERICAN  
PSYCHIATRIC  
ASSOCIATION  
PUBLISHING

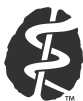

[www.appi.org](http://www.appi.org)

Email: [appi@psych.org](mailto:appi@psych.org)

Toll Free: 1-800-368-5777

20% Discount for American Psychiatric Association Members

25% Discount for APA Resident-Fellow Members

Please use Priority Code AH1711A when ordering.

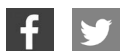

# New and Essential Geriatric Psychiatry Titles

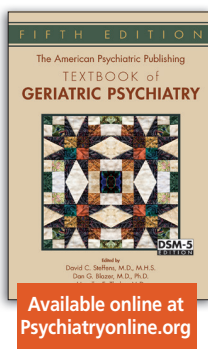

## The American Psychiatric Publishing Textbook of Geriatric Psychiatry, Fifth Edition

*Edited by David C. Steffens, M.D., M.H.S., Dan G. Blazer, M.D., Ph.D., and Mugdha E. Thakur, M.D.*

This Fifth Edition is an indispensable resource for psychiatric clinicians and trainees charged with assessing, diagnosing, and treating mental disorders. Building on the prodigious strengths of previous editions, this revision is the most current, comprehensive, and systematic textbook of geriatric psychiatry available today, and the only one that is DSM-5® concordant.

Widely recognized as the standard in its field, the book serves a critical need for clinicians challenged to meet the mental health needs of an aging population.

2015 • 837 pages • ISBN 978-1-58562-484-3 • Hardcover • \$192.00 • Item #62484  
2015 • 837 pages • ISBN 978-1-58562-522-2 • eBook • \$154.00 • Item #62522  
2015 • 12 Month Subscription • Online at Psychiatryonline.org • \$166.00 • Item #537005

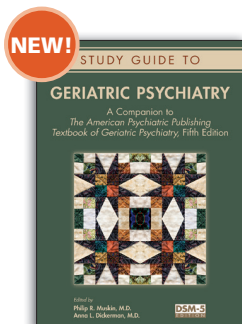

## Study Guide to Geriatric Psychiatry

**A Companion to The American Psychiatric Publishing Textbook of Geriatric Psychiatry, Fifth Edition**

*Philip R. Muskin, M.D., and Anna L. Dickerman, M.D.*

*Study Guide to Geriatric Psychiatry* is a question-and-answer companion that allows you to evaluate your mastery of the subject matter as you progress through *The American Psychiatric Publishing Textbook of Geriatric Psychiatry*, Fifth Edition. The *Study Guide* is made up of approximately 255 questions divided into 25 individual quizzes that correspond to chapters in the textbook. Questions are followed by an answer guide that references relevant text in the textbook. Each answer is accompanied by a discussion that addresses the correct response and also explains why other responses are not correct.

2017 • 352 pages • ISBN 978-1-61537-045-0 • Paperback • \$62.00 • Item #37045  
2017 • 352 pages • ISBN 978-1-61537-106-8 • eBook • \$49.95 • Item #37106

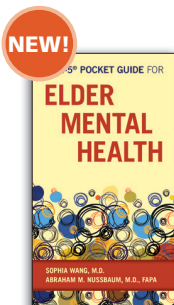

## DSM-5® Pocket Guide for Elder Mental Health

*Sophia Wang, M.D., and Abraham M. Nussbaum, M.D., FAPA*

The *DSM-5 Pocket Guide for Elder Mental Health* is an easily understandable tool for psychiatric and non-psychiatric professionals. It captures the essence of geriatric principles including care coordination, functional status, and the well-being of the caregiver as well as the patient in the context of well-crafted case scenarios. Drs. Wang and Nussbaum have truly operationalized the DSM-5 for geriatric providers and patients.

2017 • 375 pages • ISBN 978-1-61537-056-6 • Paperback • \$65.00 • Item #37056  
2017 • 375 pages • ISBN 978-1-61537-119-8 • eBook • \$52.00 • Item #37119

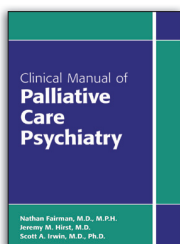

## Clinical Manual of Palliative Care Psychiatry

*Nathan Fairman, M.D., M.P.H., Jeremy M. Hirst, M.D., and Scott A. Irwin, M.D., Ph.D.*

The book seeks to bridge the gulf between principles and practice for two groups of clinicians: front-line palliative care providers with little mental health training and mental health specialists who may lack familiarity with palliative care practice. The book reviews palliative care principles and practice models, treatment of the psychiatric symptoms most commonly encountered in palliative care settings.

2016 • 297 pages • ISBN 978-1-58562-476-8 Paperback • \$61.00 • Item #62476  
2016 • 297 pages • ISBN 978-1-61537-061-0 eBook • \$48.95 • Item #37061

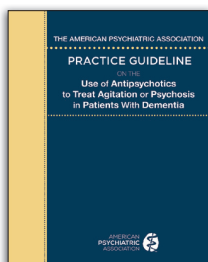

## The American Psychiatric Association Practice Guideline on the Use of Antipsychotics to Treat Agitation or Psychosis in Patients With Dementia

*American Psychiatric Association*

The guideline offers clear, concise, and actionable recommendation statements to help clinicians to incorporate recommendations into clinical practice, with the goal of improving quality of care. Each recommendation is given a rating that reflects the level of confidence that potential benefits of an intervention outweigh potential harms.

2016 • 218 pages • ISBN 978-0-89042-677-7 • Paperback • \$65.00 • Item #2677  
2016 • 218 pages • ISBN 978-0-89042-678-4 • eBook • \$52.00 • Item #2678
