SPRING 2017 | VOLUME 15 | NUMBER 2

# Focus

The Journal of Lifelong Learning in Psychiatry

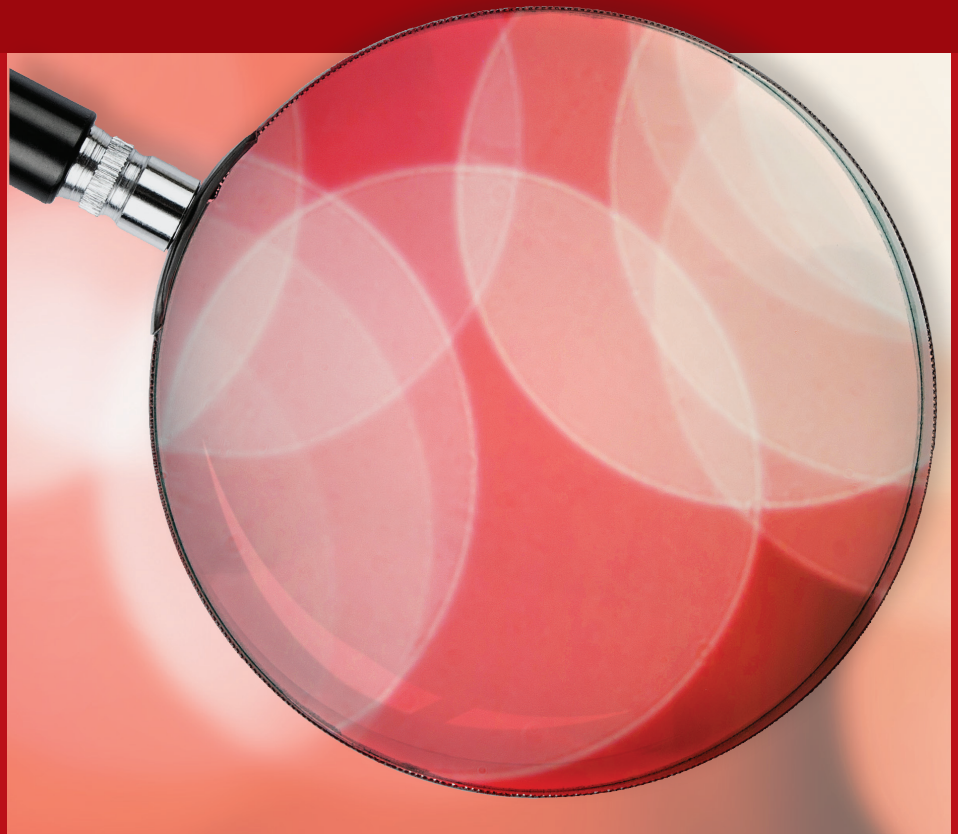

## Anxiety Across the Lifespan

Guest Editor: Andrew W. Goddard, M.D.

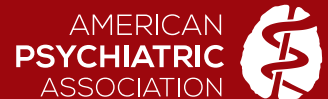

[focus.psychiatryonline.org](http://focus.psychiatryonline.org)
